# Supplementary material
Source: publisher figshare collection journal article supplement (https://gsajournals.figshare.com/articles/dataset/_/7043366)
Supplement: Supplementary file 1 [file 1]

**Table S1 *S. pombe* strains used in this study**

| Strains                          | Genotype                                                                                       | Sources                |
|----------------------------------|------------------------------------------------------------------------------------------------|------------------------|
| JS23 (wild-type, WT)             | <i>h<sup>+</sup> ura4.294 leu1.32</i>                                                          | VandeWeghe & Ow 1999   |
| <i>pap1Δ</i>                     | <i>h<sup>+</sup> ura4.294 leu1.32 pap1::kanMX6</i>                                             | He <i>et. al.</i> 2017 |
| <i>HA-pap1<sup>+</sup> oxs1Δ</i> | <i>h<sup>+</sup> ura4.294 leu1.32 oxs1::ura4<sup>+</sup> pap1:: HA-pap1<sup>+</sup>-kanMX6</i> | He <i>et. al.</i> 2017 |
| <i>caf5Δ</i>                     | <i>h<sup>+</sup> ura4.294 leu1.32 caf5::ura4<sup>+</sup></i>                                   | This study             |
| <i>obr1Δ</i>                     | <i>h<sup>+</sup> ura4.294 leu1.32 obr1::kanMX6</i>                                             | This study             |
| <i>SPCC663.08cΔ</i>              | <i>h<sup>+</sup> ura4.294 leu1.32 SPCC663.08c::hphMX6</i>                                      | This study             |
| <i>caf5Δ obr1Δ</i>               | <i>h<sup>+</sup> ura4.294 leu1.32 caf5::ura4<sup>+</sup> obr1::kanMX6</i>                      | This study             |
| <i>caf5Δ obr1Δ SPCC663.08cΔ</i>  | <i>h<sup>+</sup> ura4.294 leu1.32 caf5::ura4<sup>+</sup> obr1::kanMX6 SPCC663.08c::hphMX6</i>  | This study             |

He, Y., Y. Chen, W. Song, L. Zhu, Z. Dong, and Ow, D.W, 2017 A Pap1-Oxs1 signaling pathway for disulfide stress in *Schizosaccharomyces pombe*. Nucleic Acids Res. 45: 106-114.

Vande, J. W., and D. W. Ow, 1999 A fission yeast gene for mitochondrial sulfide oxidation. J. Biol. Chem. 274: 13250-13257.

Table S2 Plasmids used in this study

| Plasmids                                                                         | cDNA inserts flanking by indicated restriction sites                                                                        | Sources                   |
|----------------------------------------------------------------------------------|-----------------------------------------------------------------------------------------------------------------------------|---------------------------|
| pART1                                                                            | -                                                                                                                           | McLeod <i>et al.</i> 1987 |
| pSLF173                                                                          | -                                                                                                                           | Forsburg and Sherman 1997 |
| pART1- <i>pap1</i> <sup>+</sup>                                                  | <i>Bam</i> H I- <i>pap1</i> <sup>+</sup> - <i>Sac</i> I                                                                     | He <i>et al.</i> 2017     |
| pSLF173- <i>pap1</i> <sup>+</sup> - <i>mCherry</i>                               | <i>Not</i> I- <i>pap1</i> <sup>+</sup> - <i>Cla</i> I- <i>mCherry-Sal</i> I                                                 | He <i>et al.</i> 2017     |
| pART1- <i>oxs1</i> <sup>+</sup>                                                  | <i>Bam</i> H I- <i>oxs1</i> <sup>+</sup> - <i>Sac</i> I                                                                     | He <i>et al.</i> 2017     |
| pART1- <i>oxs1</i> <sup>I107S</sup>                                              | <i>Bam</i> H I- <i>oxs1</i> <sup>I107S</sup> - <i>Sac</i> I                                                                 | This study                |
| pART1- <i>oxs1</i> <sup>A110V</sup>                                              | <i>Bam</i> H I- <i>oxs1</i> <sup>A110V</sup> - <i>Sac</i> I                                                                 | This study                |
| pART1- <i>oxs1</i> <sup>L111W</sup>                                              | <i>Bam</i> H I- <i>oxs1</i> <sup>L111W</sup> - <i>Sac</i> I                                                                 | This study                |
| pART1- <i>oxs1</i> <sup>L113F</sup>                                              | <i>Bam</i> H I- <i>oxs1</i> <sup>L113F</sup> - <i>Sac</i> I                                                                 | This study                |
| pART1- <i>oxs1</i> <sup>L114F</sup>                                              | <i>Bam</i> H I- <i>oxs1</i> <sup>L114F</sup> - <i>Sac</i> I                                                                 | This study                |
| pART1- <i>oxs1</i> <sup>S115R</sup>                                              | <i>Bam</i> H I- <i>oxs1</i> <sup>S115R</sup> - <i>Sac</i> I                                                                 | This study                |
| pART1- <i>oxs1</i> <sup>S115G</sup>                                              | <i>Bam</i> H I- <i>oxs1</i> <sup>S115G</sup> - <i>Sac</i> I                                                                 | This study                |
| pART1- <i>oxs1</i> <sup>L116F</sup>                                              | <i>Bam</i> H I- <i>oxs1</i> <sup>L116F</sup> - <i>Sac</i> I                                                                 | This study                |
| pART1- <i>aa1</i> -131                                                           | <i>Bam</i> H I- <i>aa1</i> -131- <i>Sac</i> I                                                                               | This study                |
| pART1- <i>aa100</i> -207                                                         | <i>Bam</i> H I- <i>aa100</i> -207- <i>Sac</i> I                                                                             | This study                |
| pART1- <i>aa1</i> -106                                                           | <i>Bam</i> H I- <i>aa1</i> -106- <i>Sac</i> I                                                                               | This study                |
| pART1- <i>aa117</i> -207                                                         | <i>Bam</i> H I- <i>aa117</i> -207- <i>Sac</i> I                                                                             | This study                |
| pART1- <i>aa100</i> -131                                                         | <i>Bam</i> H I- <i>aa100</i> -131- <i>Sac</i> I                                                                             | This study                |
| pART1- <i>gfp</i> <sup>+</sup>                                                   | <i>Pst</i> I- <i>gfp</i> <sup>+</sup> - <i>Bam</i> H I                                                                      | This study                |
| pART1- <i>gfp</i> <sup>+</sup> - <i>oxs1</i> <sup>+</sup>                        | <i>Pst</i> I- <i>gfp</i> <sup>+</sup> - <i>Bam</i> H I- <i>oxs1</i> <sup>+</sup> - <i>Sac</i> I                             | He <i>et al.</i> 2017     |
| pART1- <i>oxs1</i> <sup>+</sup> - <i>gfp</i> <sup>+</sup>                        | <i>Pst</i> I- <i>oxs1</i> <sup>+</sup> - <i>Bam</i> H I- <i>gfp</i> <sup>+</sup> - <i>Sac</i> I                             | This study                |
| pART1- <i>gfp</i> <sup>+</sup> - <i>oINES</i>                                    | <i>Pst</i> I- <i>gfp</i> <sup>+</sup> - <i>Bam</i> H I- <i>oINES</i> - <i>Sac</i> I                                         | This study                |
| pART1- <i>oINES</i> - <i>gfp</i> <sup>+</sup>                                    | <i>Pst</i> I- <i>oINES</i> - <i>Bam</i> H I- <i>gfp</i> <sup>+</sup> - <i>Sac</i> I                                         | This study                |
| pART1- <i>gfp</i> <sup>+</sup> - <i>aa100</i> -131                               | <i>Pst</i> I- <i>gfp</i> <sup>+</sup> - <i>Bam</i> H I- <i>aa100</i> -131- <i>Sac</i> I                                     | This study                |
| pART1- <i>aa100</i> -131- <i>gfp</i> <sup>+</sup>                                | <i>Pst</i> I- <i>aa100</i> -131- <i>Bam</i> H I- <i>gfp</i> <sup>+</sup> - <i>Sac</i> I                                     | This study                |
| pART1- <i>gfp</i> <sup>+</sup> - <i>oxs1</i> <sup>I107S</sup>                    | <i>Pst</i> I- <i>gfp</i> <sup>+</sup> - <i>Bam</i> H I- <i>oxs1</i> <sup>I107S</sup> - <i>Sac</i> I                         | This study                |
| pART1- <i>gfp</i> <sup>+</sup> - <i>oxs1</i> <sup>A110V</sup>                    | <i>Pst</i> I- <i>gfp</i> <sup>+</sup> - <i>Bam</i> H I- <i>oxs1</i> <sup>A110V</sup> - <i>Sac</i> I                         | This study                |
| pART1- <i>gfp</i> <sup>+</sup> - <i>oxs1</i> <sup>L111W</sup>                    | <i>Pst</i> I- <i>gfp</i> <sup>+</sup> - <i>Bam</i> H I- <i>oxs1</i> <sup>L111W</sup> - <i>Sac</i> I                         | This study                |
| pART1- <i>gfp</i> <sup>+</sup> - <i>oxs1</i> <sup>L113F</sup>                    | <i>Pst</i> I- <i>gfp</i> <sup>+</sup> - <i>Bam</i> H I- <i>oxs1</i> <sup>L113F</sup> - <i>Sac</i> I                         | This study                |
| pART1- <i>gfp</i> <sup>+</sup> - <i>oxs1</i> <sup>L114F</sup>                    | <i>Pst</i> I- <i>gfp</i> <sup>+</sup> - <i>Bam</i> H I- <i>oxs1</i> <sup>L114F</sup> - <i>Sac</i> I                         | This study                |
| pART1- <i>gfp</i> <sup>+</sup> - <i>oxs1</i> <sup>S115G</sup>                    | <i>Pst</i> I- <i>gfp</i> <sup>+</sup> - <i>Bam</i> H I- <i>oxs1</i> <sup>S115G</sup> - <i>Sac</i> I                         | This study                |
| pART1- <i>gfp</i> <sup>+</sup> - <i>oxs1</i> <sup>L116F</sup>                    | <i>Pst</i> I- <i>gfp</i> <sup>+</sup> - <i>Bam</i> H I- <i>oxs1</i> <sup>L116F</sup> - <i>Sac</i> I                         | This study                |
| pART1- <i>gfp</i> <sup>+</sup> - <i>oINES</i> <sup>I107A</sup>                   | <i>Pst</i> I- <i>gfp</i> <sup>+</sup> - <i>Bam</i> H I- <i>oINES</i> <sup>I107A</sup> - <i>Sac</i> I                        | This study                |
| pART1- <i>gfp</i> <sup>+</sup> - <i>oINES</i> <sup>A110V</sup>                   | <i>Pst</i> I- <i>gfp</i> <sup>+</sup> - <i>Bam</i> H I- <i>oINES</i> <sup>A110V</sup> - <i>Sac</i> I                        | This study                |
| pART1- <i>gfp</i> <sup>+</sup> - <i>oINES</i> <sup>L111A</sup>                   | <i>Pst</i> I- <i>gfp</i> <sup>+</sup> - <i>Bam</i> H I- <i>oINES</i> <sup>L111A</sup> - <i>Sac</i> I                        | This study                |
| pART1- <i>gfp</i> <sup>+</sup> - <i>oINES</i> <sup>L113A</sup>                   | <i>Pst</i> I- <i>gfp</i> <sup>+</sup> - <i>Bam</i> H I- <i>oINES</i> <sup>L113A</sup> - <i>Sac</i> I                        | This study                |
| pART1- <i>gfp</i> <sup>+</sup> - <i>oINES</i> <sup>L114A</sup>                   | <i>Pst</i> I- <i>gfp</i> <sup>+</sup> - <i>Bam</i> H I- <i>oINES</i> <sup>L114A</sup> - <i>Sac</i> I                        | This study                |
| pART1- <i>gfp</i> <sup>+</sup> - <i>oINES</i> <sup>S115R</sup>                   | <i>Pst</i> I- <i>gfp</i> <sup>+</sup> - <i>Bam</i> H I- <i>oINES</i> <sup>S115R</sup> - <i>Sac</i> I                        | This study                |
| pART1- <i>gfp</i> <sup>+</sup> - <i>oINES</i> <sup>S115G</sup>                   | <i>Pst</i> I- <i>gfp</i> <sup>+</sup> - <i>Bam</i> H I- <i>oINES</i> <sup>S115G</sup> - <i>Sac</i> I                        | This study                |
| pART1- <i>gfp</i> <sup>+</sup> - <i>oINES</i> <sup>L116A</sup>                   | <i>Pst</i> I- <i>gfp</i> <sup>+</sup> - <i>Bam</i> H I- <i>oINES</i> <sup>L116A</sup> - <i>Sac</i> I                        | This study                |
| pART1- <i>gst</i> <sup>+</sup> - <i>gfp</i> <sup>+</sup>                         | <i>Pst</i> I- <i>gst</i> <sup>+</sup> - <i>Nde</i> I- <i>gfp</i> <sup>+</sup> - <i>Bam</i> H I                              | This study                |
| pART1- <i>gst</i> <sup>+</sup> - <i>gfp</i> <sup>+</sup> - <i>oINES</i>          | <i>Pst</i> I- <i>gst</i> <sup>+</sup> - <i>Nde</i> I- <i>gfp</i> <sup>+</sup> - <i>Bam</i> H I- <i>oINES</i> - <i>Sac</i> I | This study                |
| pGEX-4T-1- <i>gst</i> <sup>+</sup>                                               | -                                                                                                                           | He <i>et al.</i> 2017     |
| pGEX-4T-1- <i>gst</i> <sup>+</sup> - <i>gfp</i> <sup>+</sup>                     | <i>Bam</i> H I- <i>gfp</i> <sup>+</sup> - <i>Xho</i> I                                                                      | This study                |
| pGEX-4T-1- <i>gst</i> <sup>+</sup> - <i>oxs1</i> <sup>+</sup>                    | <i>Bam</i> H I- <i>oxs1</i> <sup>+</sup> - <i>Xho</i> I                                                                     | He <i>et al.</i> 2017     |
| pGEX-4T-1- <i>gst</i> <sup>+</sup> - <i>oxs1</i> <sup>I107S</sup>                | <i>Bam</i> H I- <i>oxs1</i> <sup>I107S</sup> - <i>Xho</i> I                                                                 | This study                |
| pGEX-4T-1- <i>gst</i> <sup>+</sup> - <i>oxs1</i> <sup>A110V</sup>                | <i>Bam</i> H I- <i>oxs1</i> <sup>A110V</sup> - <i>Xho</i> I                                                                 | This study                |
| pGEX-4T-1- <i>gst</i> <sup>+</sup> - <i>oxs1</i> <sup>L111W</sup>                | <i>Bam</i> H I- <i>oxs1</i> <sup>L111W</sup> - <i>Xho</i> I                                                                 | This study                |
| pGEX-4T-1- <i>gst</i> <sup>+</sup> - <i>oxs1</i> <sup>L113F</sup>                | <i>Bam</i> H I- <i>oxs1</i> <sup>L113F</sup> - <i>Xho</i> I                                                                 | This study                |
| pGEX-4T-1- <i>gst</i> <sup>+</sup> - <i>oxs1</i> <sup>L114F</sup>                | <i>Bam</i> H I- <i>oxs1</i> <sup>L114F</sup> - <i>Xho</i> I                                                                 | This study                |
| pGEX-4T-1- <i>gst</i> <sup>+</sup> - <i>oxs1</i> <sup>S115G</sup>                | <i>Bam</i> H I- <i>oxs1</i> <sup>S115G</sup> - <i>Xho</i> I                                                                 | This study                |
| pGEX-4T-1- <i>gst</i> <sup>+</sup> - <i>oxs1</i> <sup>L116F</sup>                | <i>Bam</i> H I- <i>oxs1</i> <sup>L116F</sup> - <i>Xho</i> I                                                                 | This study                |
| pGEX-4T-1- <i>gst</i> <sup>+</sup> - <i>aa100</i> -131                           | <i>Bam</i> H I- <i>aa100</i> -131- <i>Xho</i> I                                                                             | This study                |
| pGEX-4T-1- <i>gst</i> <sup>+</sup> - <i>aa1</i> -106                             | <i>Bam</i> H I- <i>aa1</i> -106- <i>Xho</i> I                                                                               | This study                |
| pGEX-4T-1- <i>gst</i> <sup>+</sup> - <i>aa117</i> -207                           | <i>Bam</i> H I- <i>aa117</i> -207- <i>Xho</i> I                                                                             | This study                |
| pGEX-4T-1- <i>gst</i> <sup>+</sup> - <i>gfp</i> <sup>+</sup> - <i>aa100</i> -131 | <i>Bam</i> H I- <i>gfp</i> <sup>+</sup> - <i>Bam</i> H I- <i>aa100</i> -131- <i>Xho</i> I                                   | This study                |
| pET-21d- <i>his</i> <sup>+</sup> - <i>pap1</i> <sup>+</sup>                      | <i>Bam</i> H I- <i>pap1</i> <sup>+</sup> - <i>Hind</i> III                                                                  | He <i>et al.</i> 2017     |

Forsburg, S. L., and D. A. Sherman, 1997 General purpose tagging vectors for fission yeast. *Gene* 191: 191-195.

He, Y., Y. Chen, W. Song, L. Zhu, Z. Dong, and Ow, D.W, 2017 A Pap1-Oxs1 signaling pathway for disulfide stress in *Schizosaccharomyces pombe*. *Nucleic Acids Res.* 45: 106-114.

McLeod, M., M. Stein, and D. Beach, 1987 The product of the *mei3*<sup>+</sup> gene, expressed under control of the mating-type locus, induces meiosis and sporulation in fission yeast. *EMBO J.* 6: 729-736.

Table S3 Primer sequences

|                             | Primer name                                  | Sequence                          |
|-----------------------------|----------------------------------------------|-----------------------------------|
| <b>qRT-PCR primers</b>      |                                              |                                   |
| 1                           | <i>act1</i> <sup>+</sup> (SPBC32H8.12c)-rtF  | 5'-GCGTTGGTTATTGATAATGGCTCT-3'    |
| 2                           | <i>act1</i> <sup>+</sup> (SPBC32H8.12c)-rtR  | 5'-AGGTCAAAAATACCACGCTTGCTT-3'    |
| 3                           | <i>obr1</i> <sup>+</sup> (SPAC3C7.14c)-rtF   | 5'-AAAGGCTGGCATTGAGAA-3'          |
| 4                           | <i>obr1</i> <sup>+</sup> (SPAC3C7.14c)-rtR   | 5'-TGC GTTAAGACATCGAGTGT-3'       |
| 5                           | <i>caf5</i> <sup>+</sup> (SPBC609.04)-rtF    | 5'-CTTCGGCTCGCCAGCTCTA-3'         |
| 6                           | <i>caf5</i> <sup>+</sup> (SPBC609.04)-rtR    | 5'-CGACCATCGCTCCACCAA-3'          |
| 7                           | SPCC663.08c-rtF                              | 5'-GAAATCGAGGCATTGGAC-3'          |
| 8                           | SPCC663.08c-rtR                              | 5'-CGGCTTCATTGGCACTCT-3'          |
| 9                           | <i>srx1</i> <sup>+</sup> (SPBC106.02c)-rtF   | 5'-GCGGTTTGACTTCAGAAGATTG-3'      |
| 10                          | <i>srx1</i> <sup>+</sup> (SPBC106.02c)-rtR   | 5'-ACAGGCGTAGAGTGTTAGGGGAG-3'     |
| 11                          | <i>ctt1</i> <sup>+</sup> (SPCC757.07c)-rtF   | 5'-GTGGGTTTCGCATTAAAGTTCTAC-3'    |
| 12                          | <i>ctt1</i> <sup>+</sup> (SPCC757.07c)-rtR   | 5'-GTTACGCTTCTGAGTATGGATGA-3'     |
| 13                          | <i>trr1</i> <sup>+</sup> (SPBC3F6.03)-rtF    | 5'-GGTTGTTATTATTGGGTCTGGTC-3'     |
| 14                          | <i>trr1</i> <sup>+</sup> (SPBC3F6.03)-rtR    | 5'-CGACATCGGTGGTAGTAGTAAGC-3'     |
| 15                          | <i>ssa2</i> <sup>+</sup> (SPCC1739.13)-rtF   | 5'-ACACTTTTCCAACAACCGTGTCGAA-3'   |
| 16                          | <i>ssa2</i> <sup>+</sup> (SPCC1739.13)-rtR   | 5'-GTTTCATGGCGCACTTGGTTCTTAGCA-3' |
| 17                          | <i>wis2</i> <sup>+</sup> (SPAC1B3.03c)-rtF   | 5'-GTAATGGAACGGGTGGAGAAAGCA-3'    |
| 18                          | <i>wis2</i> <sup>+</sup> (SPAC1B3.03c)-rtR   | 5'-TCCAAATGAGGGGTGGGAACAGTA-3'    |
| 19                          | <i>hsp90</i> <sup>+</sup> (SPAC926.04c)-rtF  | 5'-CTTCCGATGCCTTGGACAAAATTCG-3'   |
| 20                          | <i>hsp90</i> <sup>+</sup> (SPAC926.04c)-rtR  | 5'-TACCGGTATCGCGAATGCTAAGGA-3'    |
| 21                          | SPBC36.02c-rtF                               | 5'-TCCTATTATTTGGGCTCCGCTGTCT-3'   |
| 22                          | SPBC36.02c-rtR                               | 5'-TCGTTTGAATGTCTTTGCCAACAGC-3'   |
| 23                          | <i>sro1</i> <sup>+</sup> (SPBC1347.11)-rtF   | 5'-CCTCTTTAAAGGCAACGGCTTCAAG-3'   |
| 24                          | <i>sro1</i> <sup>+</sup> (SPBC1347.11)-rtR   | 5'-CGGTGGTTTGATCAGCAACATTGGA-3'   |
| 25                          | SPBC1347.14c-rtF                             | 5'-TTCTTTGCTCAGCTCCCCAATTAGG-3'   |
| 26                          | SPBC1347.14c-rtR                             | 5'-CCACCGATATCGGCATTAACCTCTGA-3'  |
| 27                          | SPAC23D3.12-rtF                              | 5'-AACGAAGTTTCCTTGGCTGATGTCG-3'   |
| 28                          | SPAC23D3.12-rtR                              | 5'-AAAGCCCATGAGCTTGAATTCTCGT-3'   |
| 29                          | <i>ght5</i> <sup>+</sup> (SPCC1235.14)-rtF   | 5'-TGTCATGTTGGTCTTCGTGTCCATG-3'   |
| 30                          | <i>ght5</i> <sup>+</sup> (SPCC1235.14)-rtR   | 5'-ATACCGATCTGCGAAACGAGATTGG-3'   |
| 31                          | <i>gal10</i> <sup>+</sup> (SPBPB2B2.12c)-rtF | 5'-CAACATGATTCCAATCCCAGAGTCG-3'   |
| 32                          | <i>gal10</i> <sup>+</sup> (SPBPB2B2.12c)-rtR | 5'-ATCTAAGTATTGCGCCTCGCCAAGT-3'   |
| 33                          | <i>gfp</i> <sup>+</sup> -rtF                 | 5'-GCGAGGGCGATGCCACCTAC-3'        |
| 34                          | <i>gfp</i> <sup>+</sup> -rtR                 | 5'-CACGCCGTAGGTCAGGGTGGTC-3'      |
| 35                          | <i>pap1</i> <sup>+</sup> (SPAC1783.07c)-rtF  | 5'-GGCAGAAAGTAAGACAGTTAGAAG-3'    |
| 36                          | <i>pap1</i> <sup>+</sup> (SPAC1783.07c)-rtR  | 5'-TAGTTGGAAGGGAAGACAATGAG-3'     |
| <b>ChIP qRT-PCR primers</b> |                                              |                                   |
| 37                          | <i>gpd3</i> <sup>+</sup> (SPBC354.12)-F      | 5'-TCAAGTGGTCTGCCTCTGG-3'         |
| 38                          | <i>gpd3</i> <sup>+</sup> (SPBC354.12)-R      | 5'-CACCGACGACGAACATGG-3'          |
| 39                          | <i>obr1</i> <sup>+</sup> (SPAC3C7.14c)-F     | 5'-CAGAAAAATGGGACAGGTAAT-3'       |
| 40                          | <i>obr1</i> <sup>+</sup> (SPAC3C7.14c)-R     | 5'-CAAACAAACCGATTTTGTGC-3'        |
| 41                          | SPCC663.08c-F                                | 5'-TCACGTAAGCATAATGATTT-3'        |
| 42                          | SPCC663.08c-R                                | 5'-GTGGATAATTTGGTGTCCGGC-3'       |
| 43                          | <i>caf5</i> <sup>+</sup> (SPBC609.04)-F      | 5'-TACGATGGATAATTGAAAGA-3'        |
| 44                          | <i>caf5</i> <sup>+</sup> (SPBC609.04)-R      | 5'-TACTAAGTGTAAGTAAGCA-3'         |
| 45                          | control (intergenic region)-F                | 5'-TCTTATTCGTTGGGTGTCCC-3'        |
| 46                          | control (intergenic region)-R                | 5'-TTTCTGATTAAGGCTATGGG-3'        |

Corresponding to Figures 5B and 5C

| Experiment | N:G | G | T |
|------------|-----|---|---|
|------------|-----|---|---|

| <b>Co-overexpressed proteins</b>  | <b>Experiments</b> | <b>N+C</b> | <b>C</b> | <b>T</b> | <b>%<br/>(N+C)/T</b> | <b>%<br/>C/T</b> |
|-----------------------------------|--------------------|------------|----------|----------|----------------------|------------------|
| GFP                               | 1                  | 4          | 64       | 68       | 6%                   | 94%              |
| + Pap1-mCherry                    | 2                  | 0          | 161      | 161      | 0%                   | 100%             |
|                                   | 3                  | 13         | 423      | 436      | 3%                   | 97%              |
| GFP-Oxs1                          | 1                  | 0          | 75       | 75       | 0%                   | 100%             |
| + Pap1-mCherry                    | 2                  | 0          | 67       | 67       | 0%                   | 100%             |
|                                   | 3                  | 0          | 132      | 132      | 0%                   | 100%             |
| GFP-o1NES <sup>I107A</sup>        | 1                  | 71         | 561      | 632      | 11%                  | 89%              |
| + Pap1-mCherry                    | 2                  | 51         | 221      | 272      | 19%                  | 81%              |
|                                   | 3                  | 28         | 209      | 237      | 12%                  | 88%              |
| GFP-o1NES <sup>L111A</sup>        | 1                  | 16         | 83       | 99       | 16%                  | 84%              |
| + Pap1-mCherry                    | 2                  | 4          | 88       | 92       | 4%                   | 96%              |
|                                   | 3                  | 37         | 135      | 172      | 22%                  | 78%              |
| GFP-o1NES <sup>L114A</sup>        | 1                  | 126        | 210      | 336      | 37%                  | 63%              |
| + Pap1-mCherry                    | 2                  | 36         | 117      | 153      | 24%                  | 76%              |
|                                   | 3                  | 274        | 135      | 409      | 67%                  | 33%              |
| GFP-o1NES <sup>L116A</sup>        | 1                  | 27         | 317      | 344      | 8%                   | 92%              |
| + Pap1-mCherry                    | 2                  | 17         | 54       | 71       | 24%                  | 76%              |
|                                   | 3                  | 3          | 79       | 82       | 4%                   | 96%              |
| GFP-o1NES                         | 1                  | 50         | 0        | 50       | 100%                 | 0%               |
| + Pap1-mCherry                    | 2                  | 41         | 0        | 41       | 100%                 | 0%               |
|                                   | 3                  | 238        | 1        | 239      | 99.6%                | 0.4%             |
| GST-GFP-o1NES                     | 1                  | 0          | 138      | 138      | 0%                   | 100%             |
| + Pap1-mCherry                    | 2                  | 0          | 142      | 142      | 0%                   | 100%             |
|                                   | 3                  | 0          | 157      | 157      | 0%                   | 100%             |
| GST-GFP                           | 1                  | 0          | 63       | 63       | 0%                   | 100%             |
| + Pap1-mCherry                    | 2                  | 0          | 104      | 104      | 0%                   | 100%             |
|                                   | 3                  | 0          | 58       | 58       | 0%                   | 100%             |
| GFP                               | 1                  | 43         | 251      | 294      | 15%                  | 85%              |
| + Wis1-mCherry                    | 2                  | 27         | 120      | 147      | 18%                  | 82%              |
|                                   | 3                  | 39         | 161      | 200      | 19%                  | 81%              |
| GFP-o1NES                         | 1                  | 213        | 39       | 252      | 85%                  | 15%              |
| + Wis1-mCherry                    | 2                  | 193        | 36       | 229      | 84%                  | 16%              |
|                                   | 3                  | 197        | 17       | 214      | 92%                  | 8%               |
| <b>Corresponding to Figure S8</b> |                    |            |          |          |                      |                  |
| GFP                               | 1                  | 46         | 602      | 648      | 7%                   | 93%              |
| + Pap1-mCherry                    | 2                  | 26         | 277      | 303      | 9%                   | 91%              |
|                                   | 3                  | 11         | 150      | 161      | 7%                   | 93%              |
| GFP-o1NES                         | 1                  | 251        | 7        | 258      | 97%                  | 3%               |
| + Pap1-mCherry                    | 2                  | 371        | 2        | 373      | 99%                  | 1%               |
|                                   | 3                  | 332        | 0        | 332      | 100%                 | 0%               |
| Oxs1                              | 1                  | 34         | 421      | 455      | 7%                   | 93%              |
| + Pap1-mCherry                    | 2                  | 39         | 523      | 562      | 7%                   | 93%              |
|                                   | 3                  | 12         | 190      | 202      | 6%                   | 94%              |

N+C: Number of cells with observable nuclear and cytoplasmic Pap1-mCherry (or Wis1-mCherry);  
C: Number of cells with exclusively cytoplasmic Pap1-mCherry (or Wis1-mCherry);  
T: Total cell number.
